# Supplementary material for: A synthetic dataset primer for the biobehavioural sciences to promote reproducibility and hypothesis generation
Source: eLife journal article supplement (doi:10.7554/elife.53275), 2020-03-11

No skew and no missing data

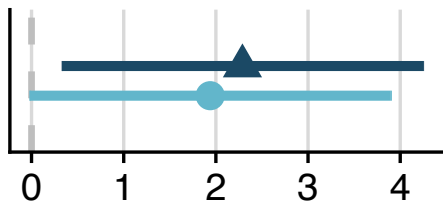

No skew and 5% missing data

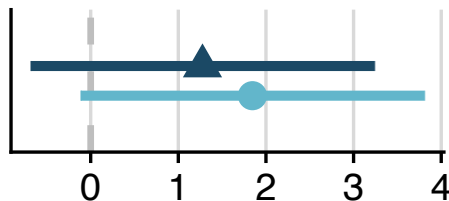

No skew and 20% missing data

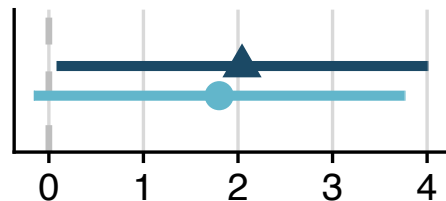

Low skew and no missing data

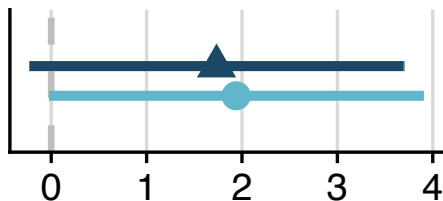

Low skew and 5% missing data

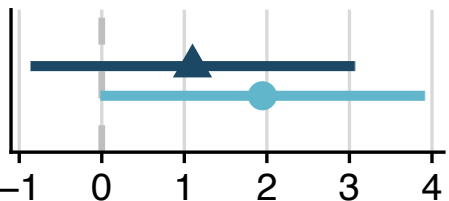

Low skew and 20% missing data

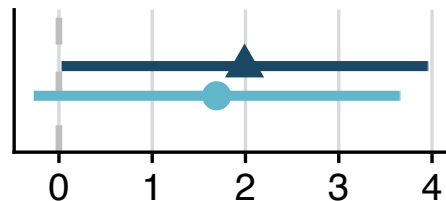

High skew and no missing data

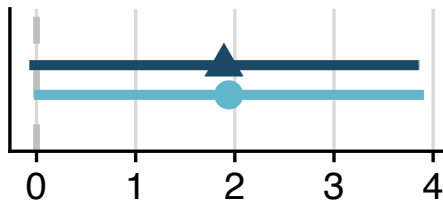

High skew and 5% missing data

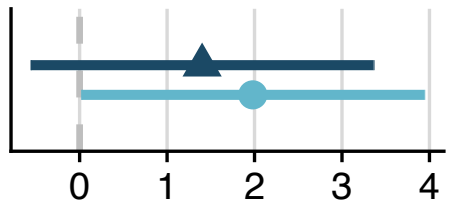

High skew and 20% missing data

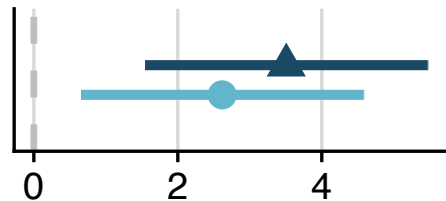

Supplement: supp [file elife_poa_e53275_Figure_3_figure_supplement_1.pdf › elife_poa_e53275_Figure_3_figure_supplement_1.pdf]
