# Supplementary material for: A synthetic dataset primer for the biobehavioural sciences to promote reproducibility and hypothesis generation
Source: eLife. 2020 Mar 11;9:e53275. doi: 10.7554/eLife.53275 (PMC7112950; doi:10.7554/eLife.53275)
Supplement: Supplementary file 1. [file elife-53275-supp1.xlsx]

## Sheet: Sheet1
Specific utility of simulated datasets
Simulated dataset	Lack of fit test [Χ2 (2)]	Standardized difference	Confidence interval overlap	Outliers (n)
40 participants
Normal distribution and no missing data	1.2, p = 0.94	0.35 (p = 0.73)	91.1%	3
Normal distribution and 5% missing data	0.3, p = 0.85	-0.57 (p = 0.57)	85.5%	3
Normal distribution and 20% missing data	0.1, p = 0.96	0.24 (p = 0.81)	94.8%	2
Low skew and no missing data	0.04, p = 0.98	-0.21 (p = 0.84)	94.8%	3
Low skew and 5% missing data	0.8, p = 0.69	-0.85 (p = 0.4)	78.4%	3
Low skew and 20% missing data	0.2, p = 0.89	0.3 (p = 0.77)	92.4%	2
High skew and no missing data	0.002, p = 0.99	-0.05 (p = 0.96)	98.7%	1
High skew and 5% missing data	0.3, p = 0.85	-0.58 (p = 0.56)	85.2%	1
High skew and 20% missing data	1, p = 0.6	0.89 (p = 0.37)	77.3%	2
100 participants
Normal distribution and no missing data	1.3, p = 0.51	1.15 (p = 0.25)	70.6%	0
Normal distribution and 5% missing data	2.6, p = 0.27	-1.55 (p = 0.12)	60.5%	0
Normal distribution and 20% missing data	1.9, p = 0.39	-1.27 (p = 0.2)	67.5%	0
Low skew and no missing data	0.7, p = 0.72	-0.81 (p = 0.42)	79.4%	1
Low skew and 5% missing data	2.5, p = 0.28	1.59 (p = 0.11)	59.3%	3
Low skew and 20% missing data	2.4, p = 0.3	0.32 (p = 0.75)	91.8%	2
High skew and no missing data	0.2, p = 0.89	-0.49 (p = 0.63)	87.5%	3
High skew and 5% missing data	1.8, p = 0.41	-1.2 (p = 0.23)	69.5%	3
High skew and 20% missing data	0.5, p = 0.79	-0.68 (p = 0.83)	82.6%	2
10000 participants
Normal distribution and no missing data	0.5, p = 0.79	-0.69 (p = 0.48)	82.3%	63
Normal distribution and 5% missing data	1.1, p = 0.57	1.04 (p = 0.3)	73.4%	62
Normal distribution and 20% missing data	1.4, p = 0.51	-0.66 (p = 0.51)	83.2%	47
Low skew and no missing data	2.8, p = 0.25	-1.67 (p = 0.09)	57.3%	138
Low skew and 5% missing data	2.7, p = 0.26	-1.61 (p = 0.11)	58.9%	135
Low skew and 20% missing data	3.6, p = 0.16	-1.82 (p = 0.07)	53.5%	115
High skew and no missing data	0.2, p = 0.92	0.42 (p = 0.67)	89.3%	314
High skew and 5% missing data	1.2, p = 0.56	1.09 (p = 0.29)	72.3%	300
High skew and 20% missing data	0.4, p = 0.81	-0.59 (p = 0.56)	85%	246
