# Supplementary figures and images for: A synthetic dataset primer for the biobehavioural sciences to promote reproducibility and hypothesis generation
Source: eLife journal article supplement (doi:10.7554/elife.53275), 2020-03-11

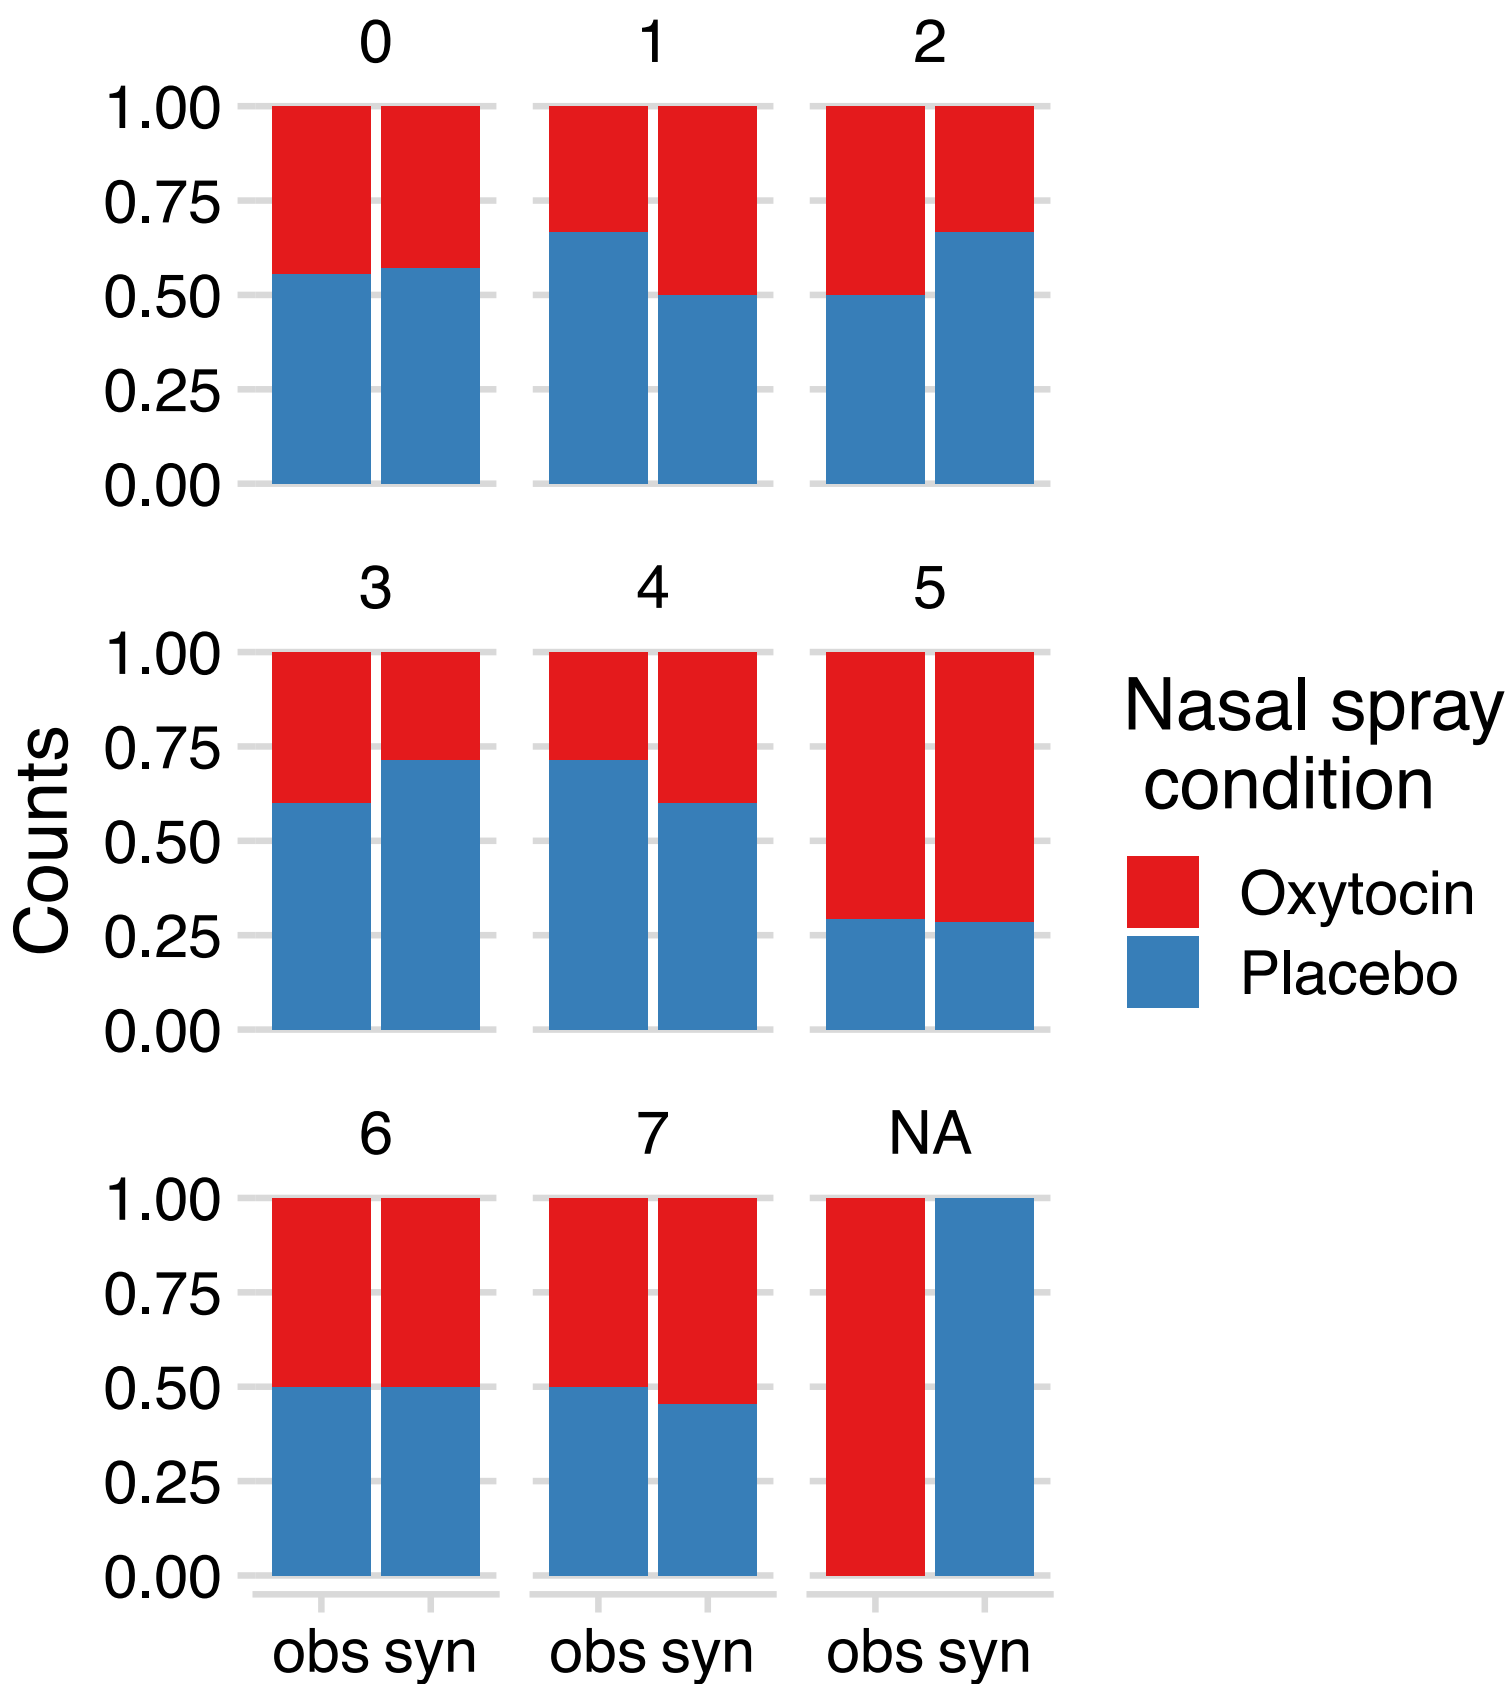

Supplement: supp [file elife_poa_e53275_Figure_1_figure_supplement_1.pdf › elife_poa_e53275_Figure_1_figure_supplement_1.pdf]

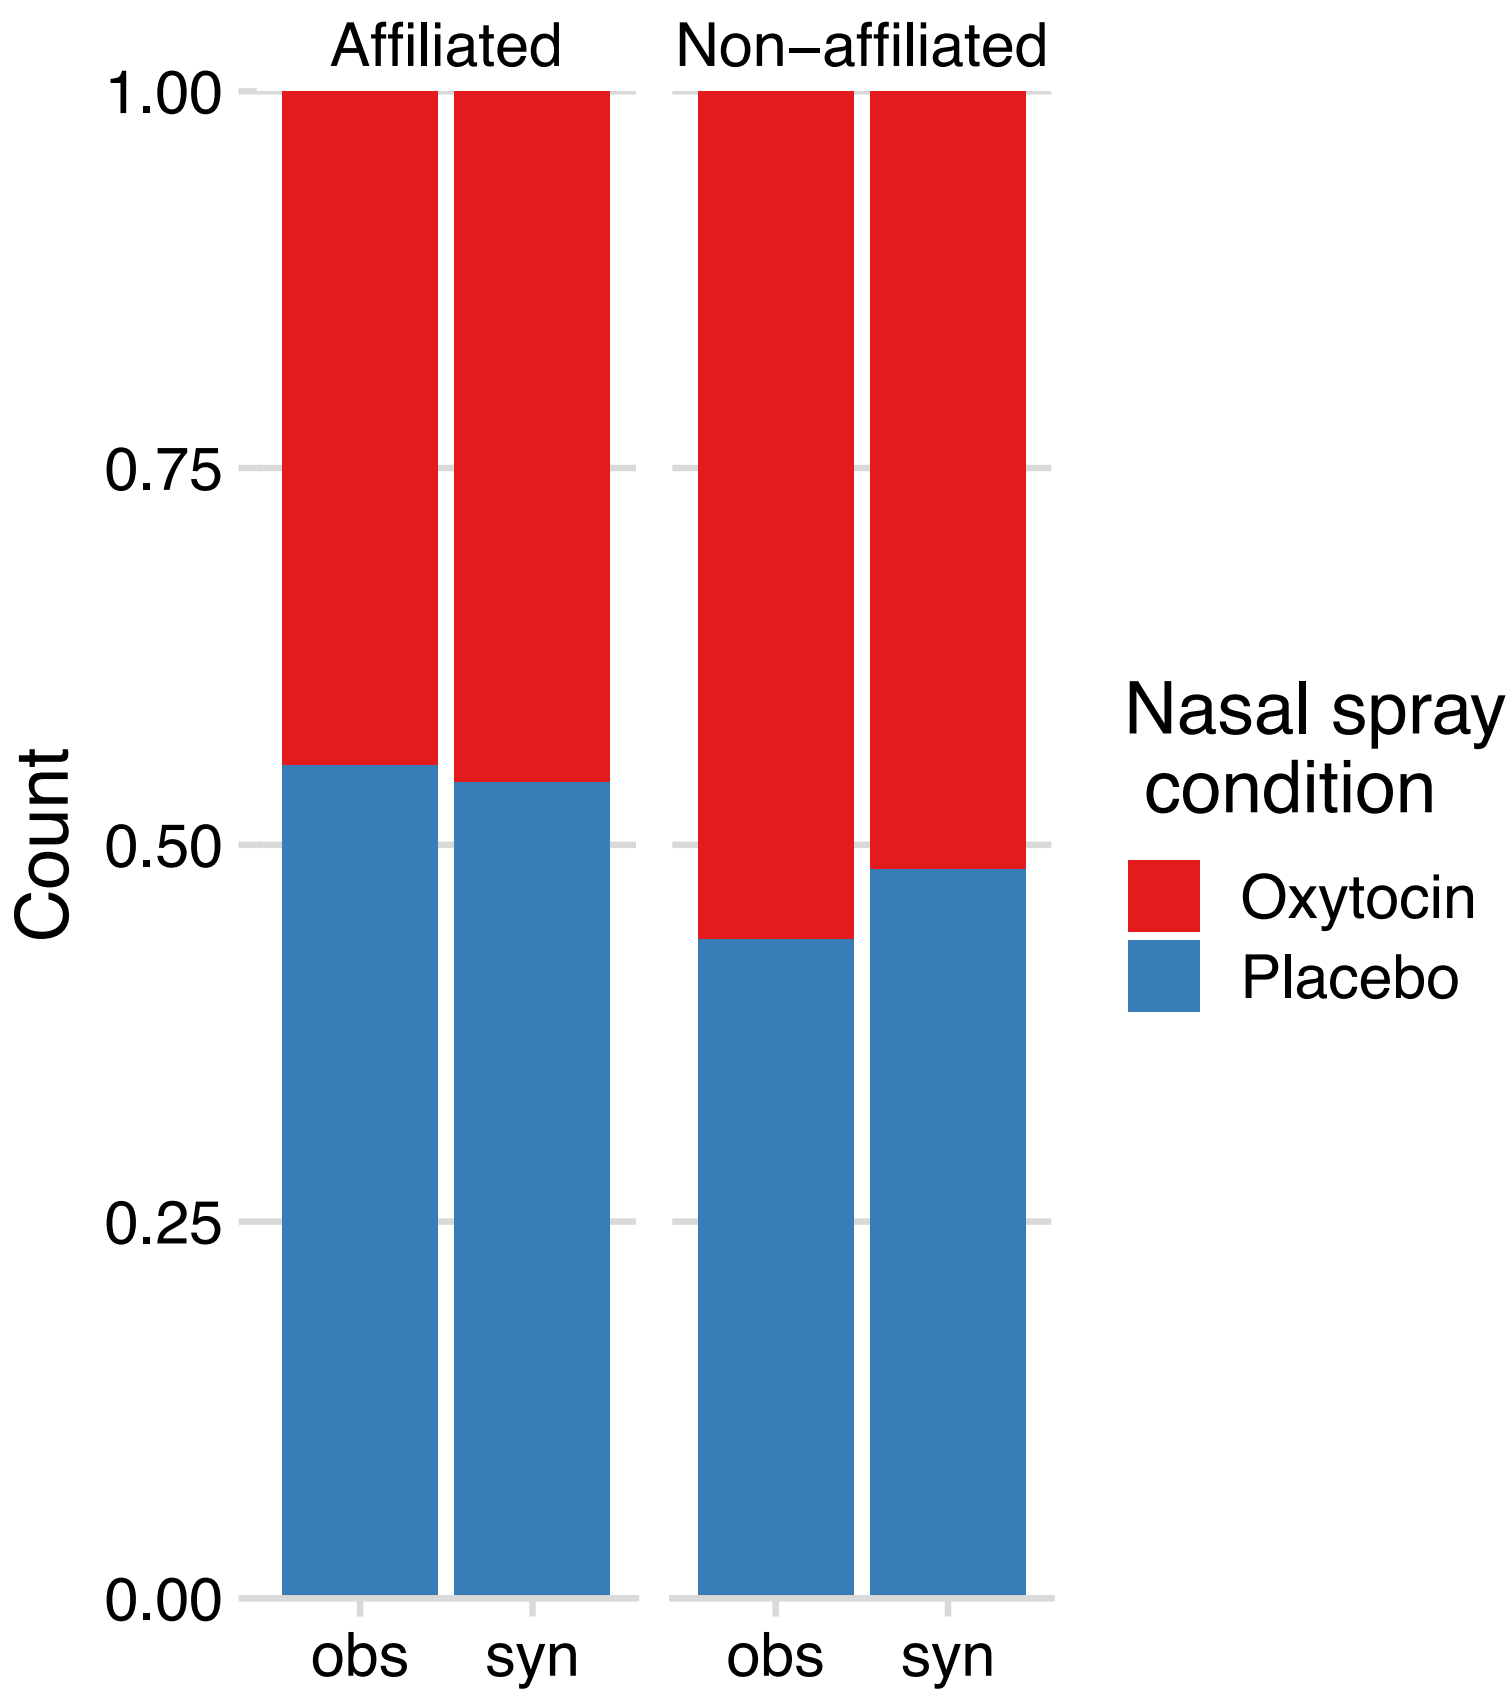

Supplement: supp [file elife_poa_e53275_Figure_1_figure_supplement_2.pdf › elife_poa_e53275_Figure_1_figure_supplement_2.pdf]

**Dataset: observed**

$t(76) = 0.31, p = 0.754, r_{\text{Pearson}} = 0.04, \text{CI}_{95\%} [-0.19, 0.26], n = 78$

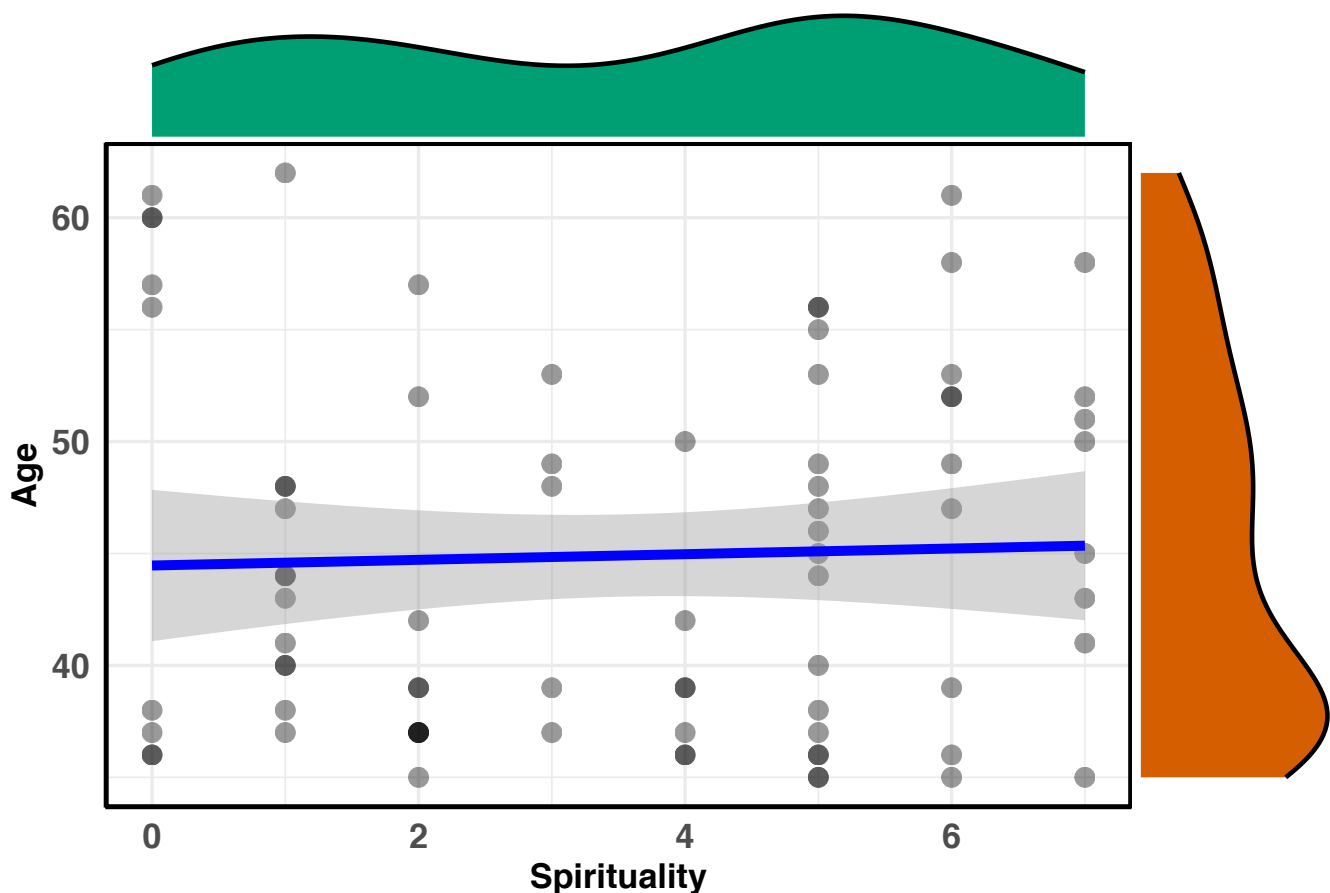

**Dataset: synthetic**

$t(76) = 0.68, p = 0.501, r_{\text{Pearson}} = 0.08, \text{CI}_{95\%} [-0.15, 0.29], n = 78$

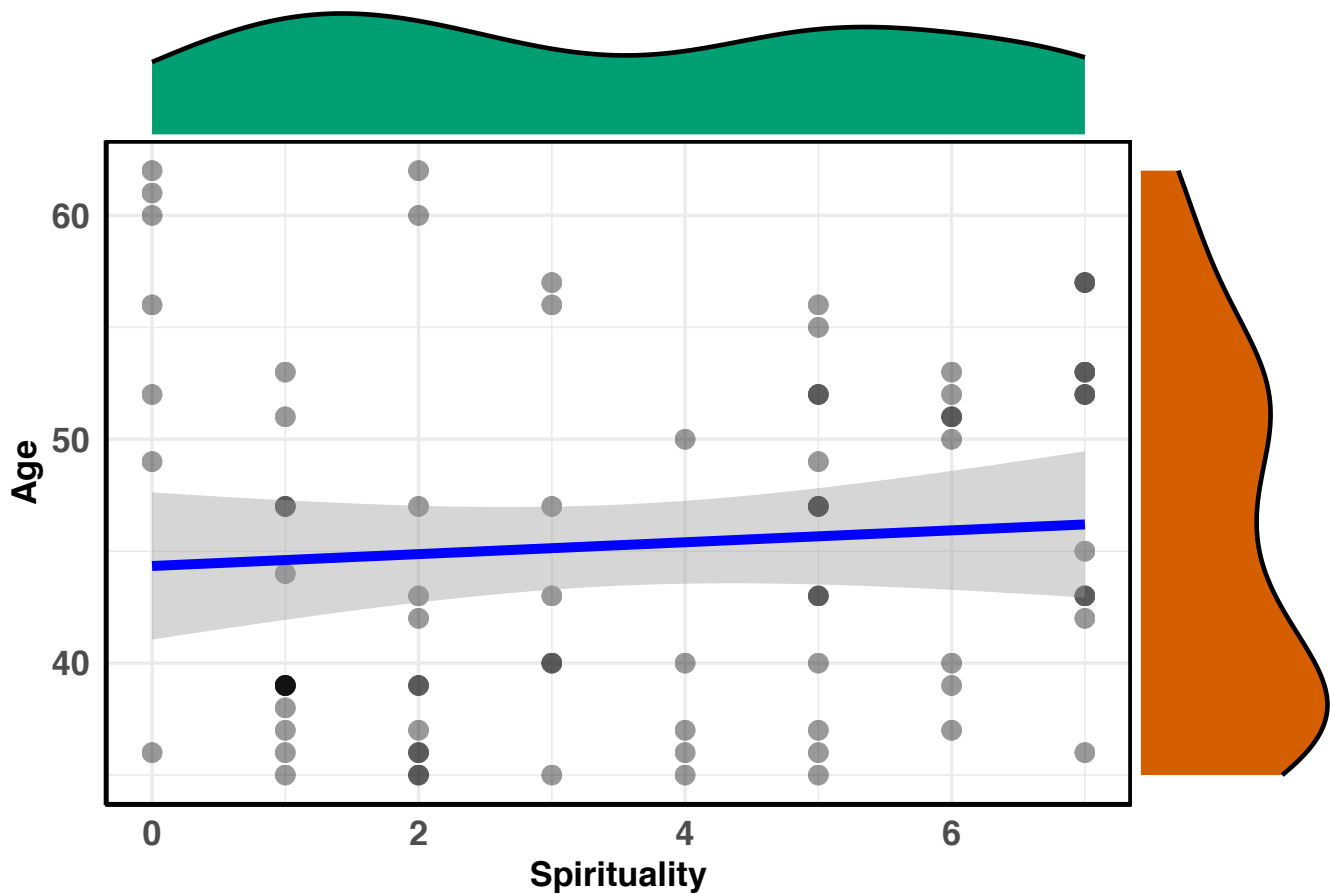

Supplement: supp [file elife_poa_e53275_Figure_1_figure_supplement_3.pdf › elife_poa_e53275_Figure_1_figure_supplement_3.pdf]

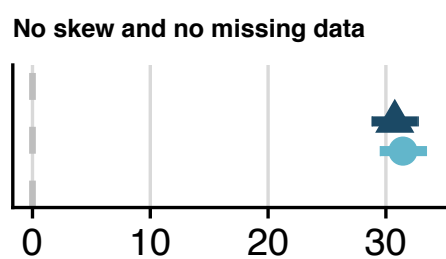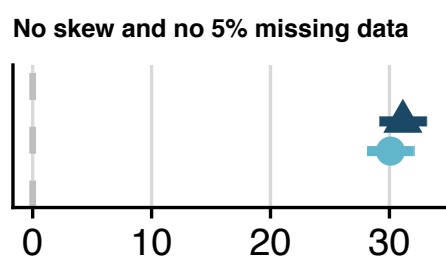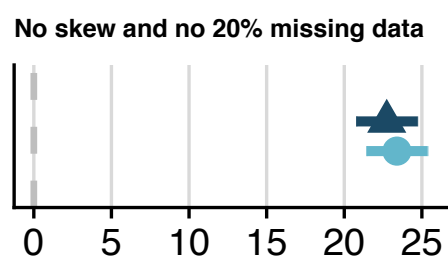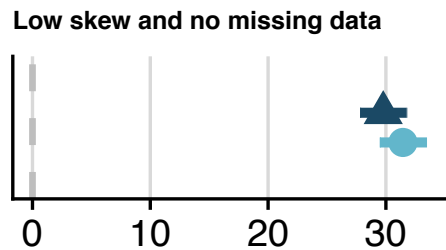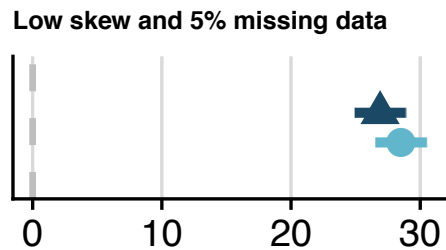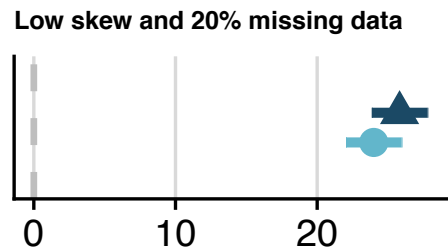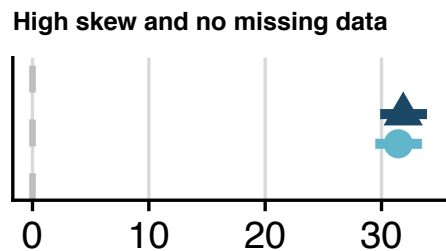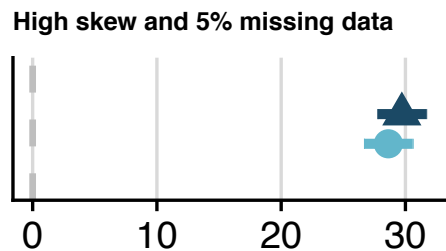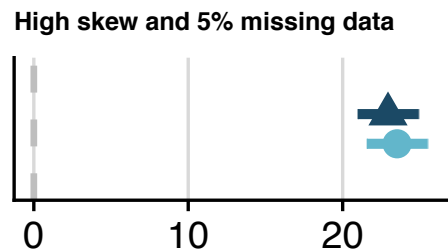

Supplement: supp [file elife_poa_e53275_Figure_3_figure_supplement_2.pdf › elife_poa_e53275_Figure_3_figure_supplement_2.pdf]

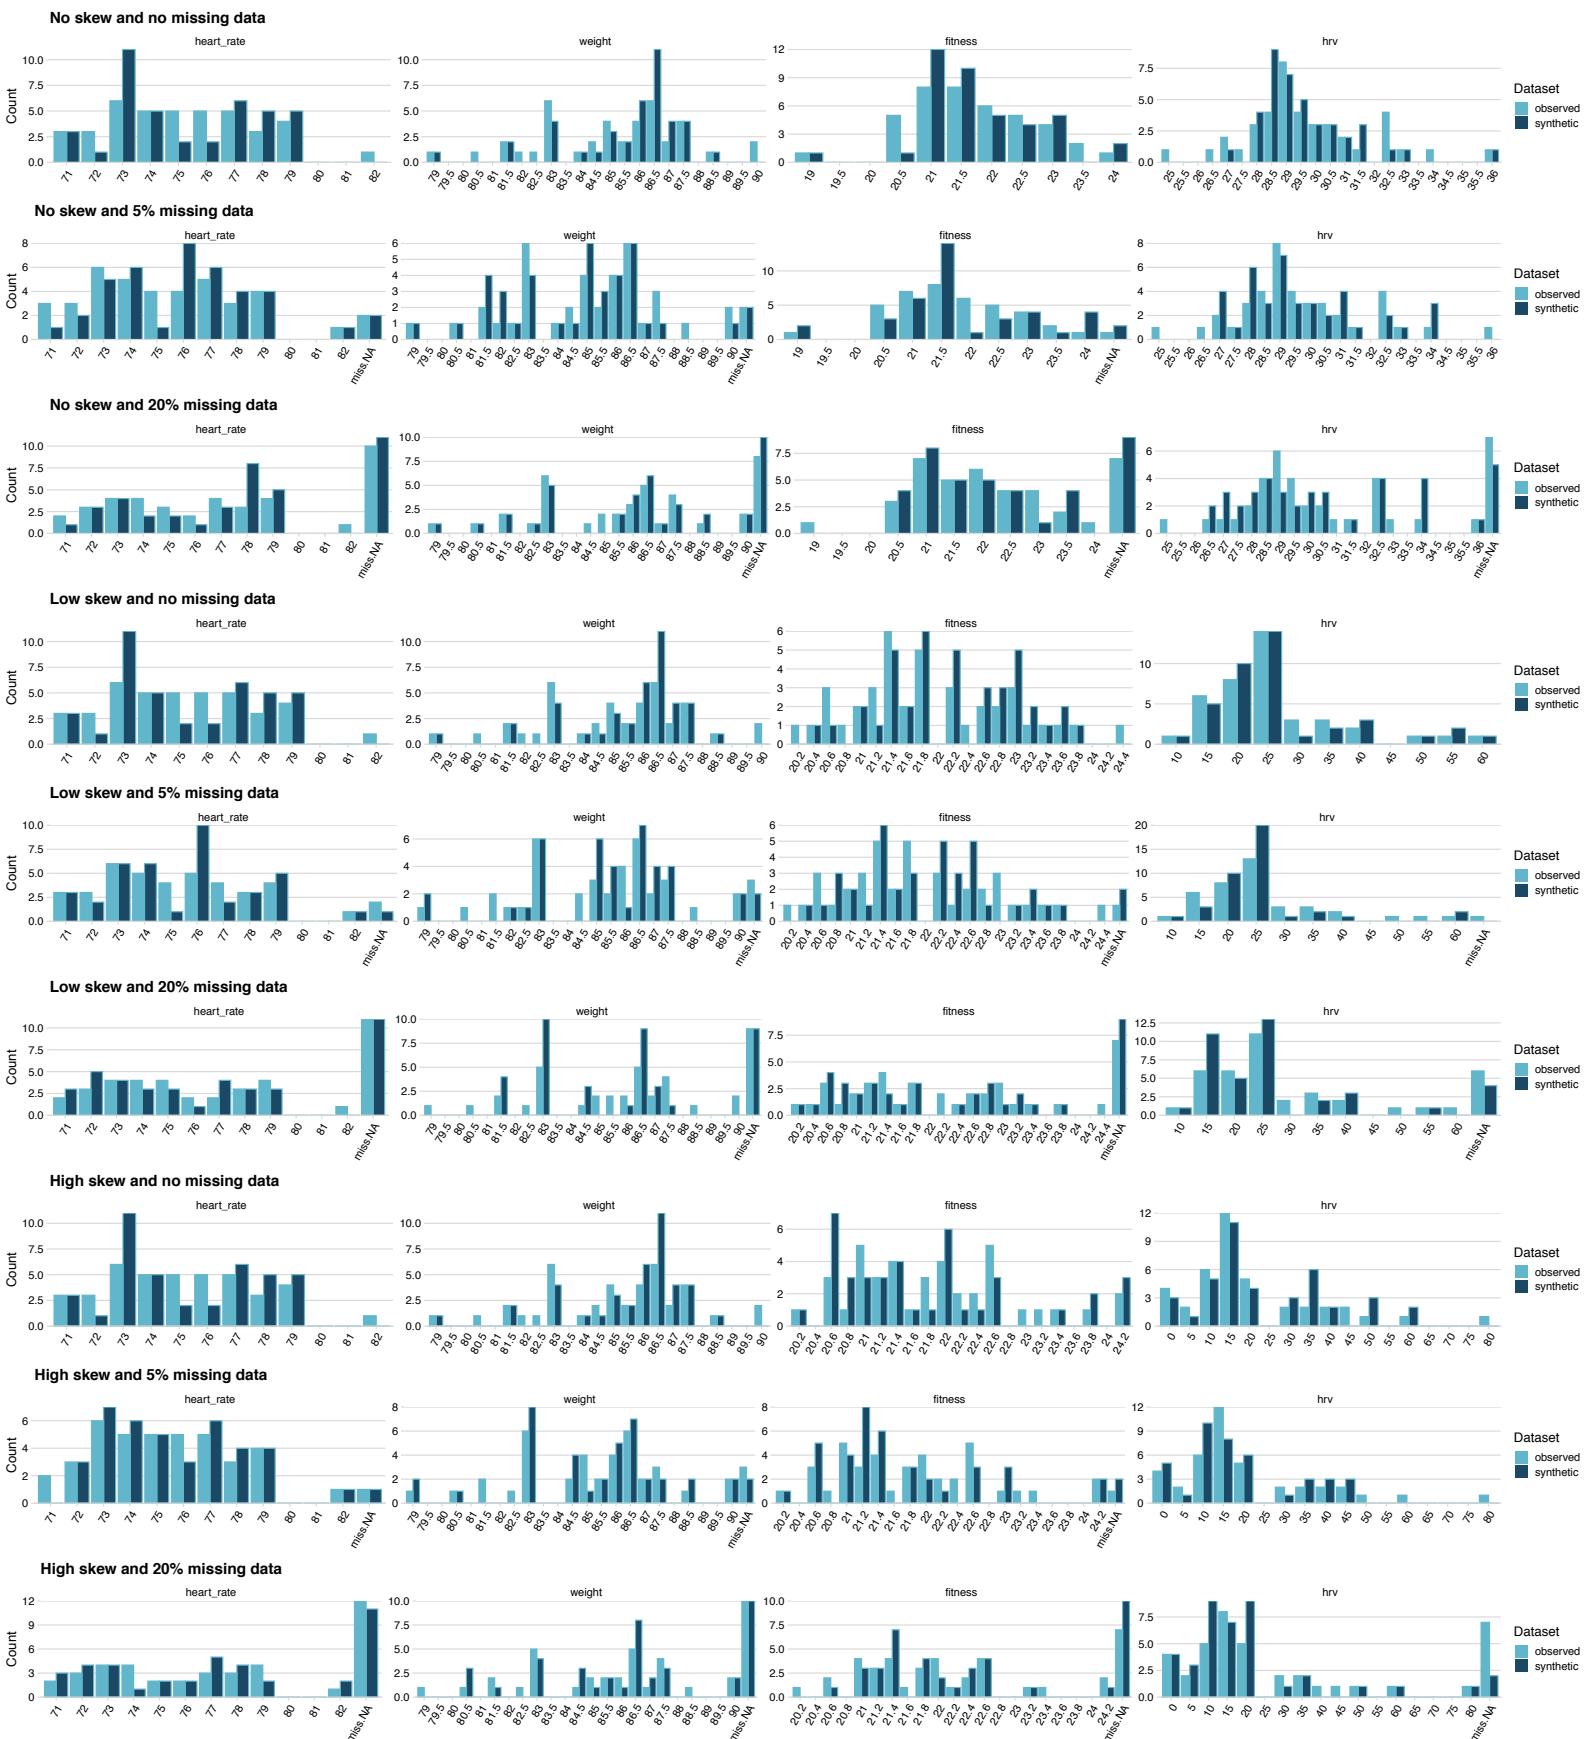

Supplement: supp [file elife_poa_e53275_Figure_3_figure_supplement_3.pdf › elife_poa_e53275_Figure_3_figure_supplement_3.pdf]

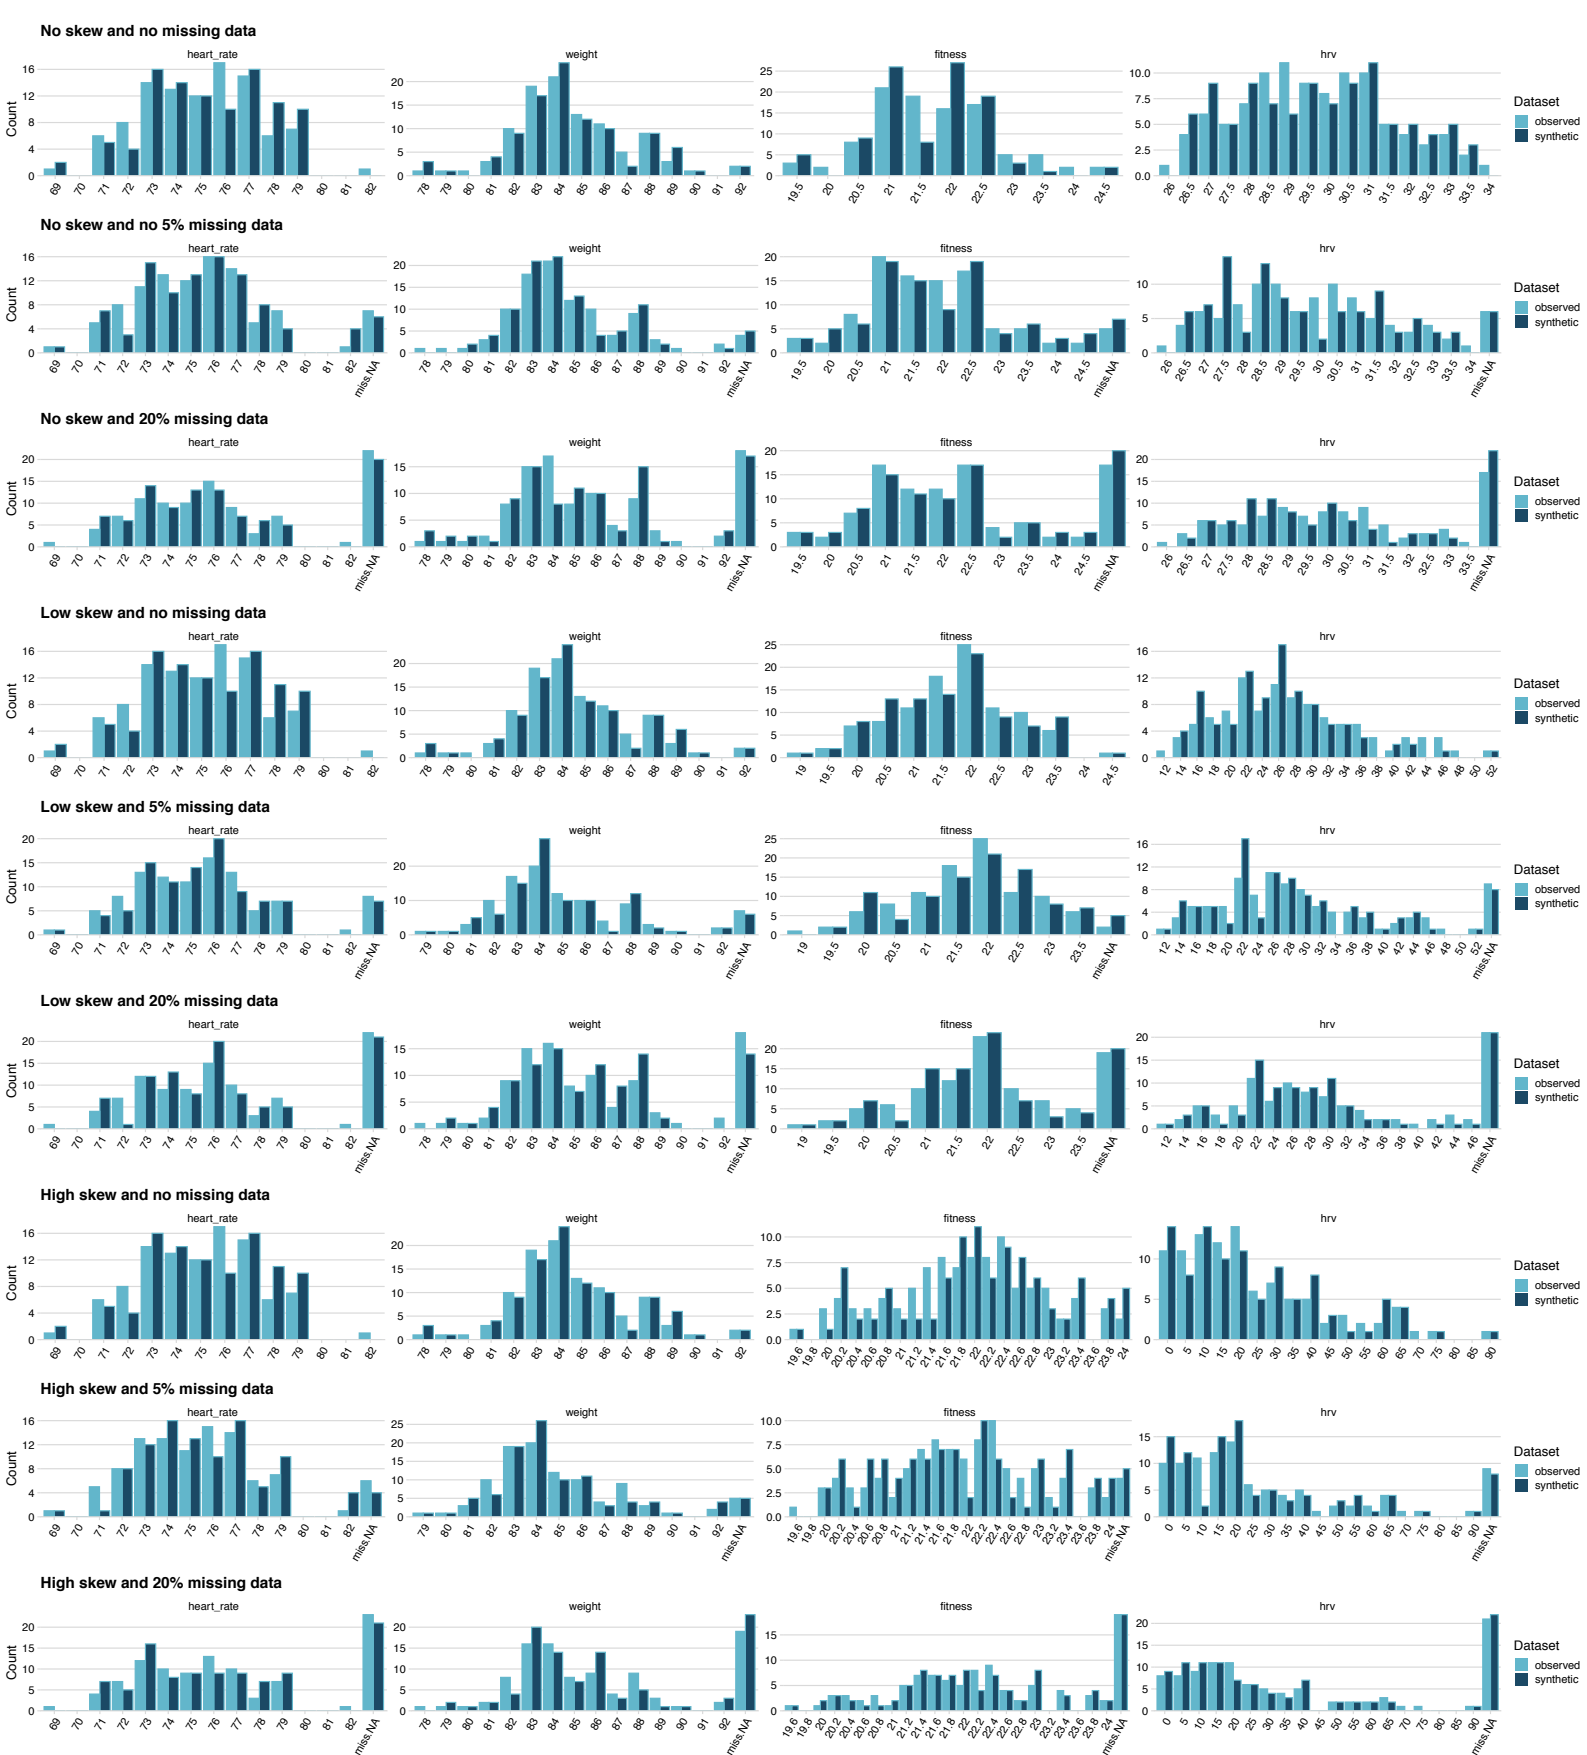

Supplement: supp [file elife_poa_e53275_Figure_3_figure_supplement_4.pdf › elife_poa_e53275_Figure_3_figure_supplement_4.pdf]

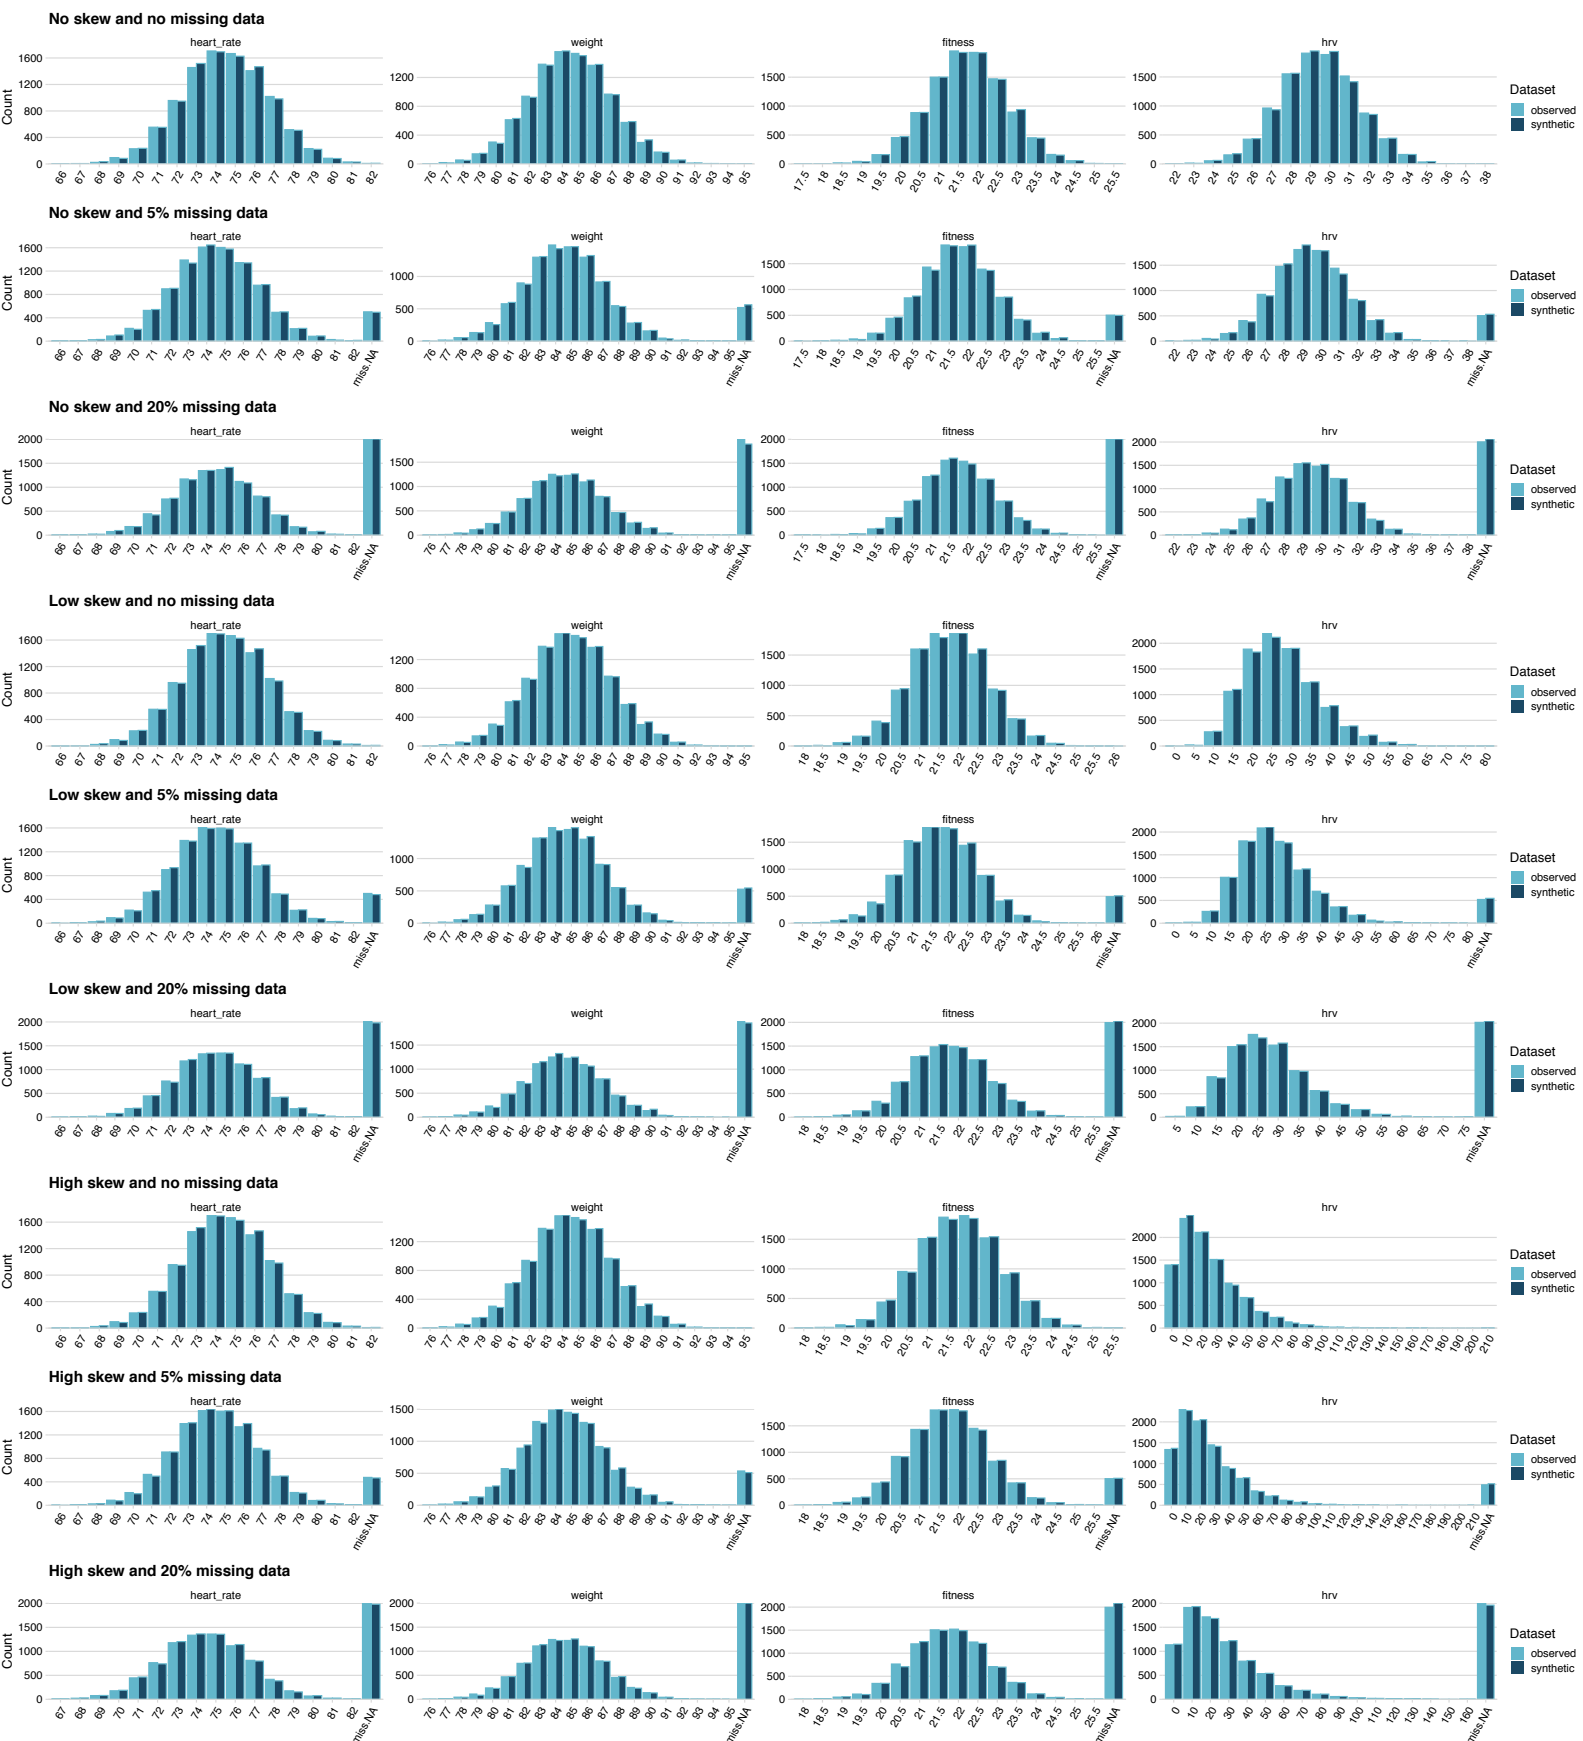

Supplement: supp [file elife_poa_e53275_Figure_3_figure_supplement_5.pdf › elife_poa_e53275_Figure_3_figure_supplement_5.pdf]
